# Supplementary material for: 3-Step flow focusing enables multidirectional imaging of bioparticles for imaging flow cytometry
Source: Royal Society of Chemistry journal article supplement (doi:10.1039/d0lc00244e), 2020-01-01
Supplement: d0lc00244e1.pdf [file d0lc00244e1.pdf]

## 1 Characteristic of the focusing condition by observation of the particle flow velocity standard deviation of 2.2 $\mu\text{m}$ polystyrene beads

Table 1 Characterization of the focusing and throughput conditions of 2.2  $\mu\text{m}$  polystyrene beads for a defined observation window in dependency of alpha

| Alpha | Center position of the observed area in $\mu\text{m}$ | Width of the observed area in $\mu\text{m}$ | U mean in mm / s | standard deviation in % | Observations per particle | Observed particles |
|-------|-------------------------------------------------------|---------------------------------------------|------------------|-------------------------|---------------------------|--------------------|
| 0.02  | 58.88                                                 | 17.4                                        | 2.37             | 2.72                    | 7                         | 187                |
| 0.05  | 58.88                                                 | 17.4                                        | 2.35             | 3.32                    | 7                         | 301                |
| 0.11  | 58.88                                                 | 17.4                                        | 2.35             | 3.80                    | 7                         | 588                |
| 0.17  | 58.88                                                 | 17.4                                        | 2.34             | 5.52                    | 7                         | 877                |
| 0.24  | 58.88                                                 | 17.4                                        | 2.35             | 7.70                    | 7                         | 1266               |
| 0.40  | 58.88                                                 | 17.4                                        | 2.31             | 11.06                   | 6                         | 1954               |
| 0.64  | 58.88                                                 | 17.4                                        | 2.33             | 12.31                   | 6                         | 2312               |

Table 2 Particle throughput at full frame for increasing alpha with constant flow velocity

| Alpha | N Frames | Mean Observations per particle | Observed particles | Particles per second |
|-------|----------|--------------------------------|--------------------|----------------------|
| 0.02  | 650      | 7.2                            | 1100               | 102                  |
| 0.05  | 480      | 7.3                            | 1572               | 197                  |
| 0.11  | 480      | 7.0                            | 3314               | 414                  |
| 0.17  | 480      | 7.0                            | 4714               | 589                  |
| 0.24  | 480      | 6.8                            | 5784               | 723                  |
| 0.40  | 480      | 6                              | 9182               | 1 148                |
| 0.64  | 480      | 5.8                            | 12015              | 1 502                |

**Table 3** Characterization of the focusing and throughput conditions of 2.2  $\mu\text{m}$  polystyrene beads for a defined observation window in dependency of the particle flow velocity at constant alpha

| <b>Alpha</b> | <b>Center position of the observed area in <math>\mu\text{m}</math></b> | <b>Width of the observed area in <math>\mu\text{m}</math></b> | <b>U mean in mm / s</b> | <b>standard deviation in %</b> | <b>Observations per particle</b> | <b>Observed particles</b> |
|--------------|-------------------------------------------------------------------------|---------------------------------------------------------------|-------------------------|--------------------------------|----------------------------------|---------------------------|
| <b>0.05</b>  | 58.88                                                                   | 17.4                                                          | 0.20                    | 8.59                           | 42                               | 60                        |
| <b>0.05</b>  | 58.88                                                                   | 17.4                                                          | 0.40                    | 5.99                           | 45                               | 57                        |
| <b>0.05</b>  | 58.88                                                                   | 17.4                                                          | 0.78                    | 4.12                           | 29                               | 58                        |
| <b>0.05</b>  | 58.88                                                                   | 17.4                                                          | 1.60                    | 2.39                           | 15                               | 118                       |
| <b>0.05</b>  | 58.88                                                                   | 17.4                                                          | 2.36                    | 3.26                           | 10                               | 151                       |
| <b>0.05</b>  | 58.88                                                                   | 17.4                                                          | 3.18                    | 2.61                           | 6                                | 208                       |
| <b>0.05</b>  | 58.88                                                                   | 17.4                                                          | 3.96                    | 2.31                           | 5                                | 274                       |
| <b>0.05</b>  | 58.88                                                                   | 17.4                                                          | 4.71                    | 3.05                           | 4                                | 366                       |
| <b>0.05</b>  | 58.88                                                                   | 17.4                                                          | 6.47                    | 3.17                           | 3                                | 556                       |
| <b>0.05</b>  | 58.88                                                                   | 17.4                                                          | 9.67                    | 2.11                           | 2                                | 885                       |

**Table 4:** Particle throughput at full frame with constant alpha and increasing flow velocity

| <b>Alpha</b> | <b>N Frames</b> | <b>Mean Observations per particle</b> | <b>Observed particles</b> | <b>Particles per second</b> |
|--------------|-----------------|---------------------------------------|---------------------------|-----------------------------|
| <b>0.20</b>  | 580             | 41.65                                 | 327                       | 44                          |
| <b>0.40</b>  | 580             | 45                                    | 277                       | 37                          |
| <b>0.78</b>  | 580             | 28.8                                  | 370                       | 50                          |
| <b>1.60</b>  | 580             | 14.57                                 | 680                       | 91                          |
| <b>2.36</b>  | 482             | 10                                    | 515                       | 83                          |
| <b>3.18</b>  | 580             | 6.4                                   | 1066                      | 143                         |
| <b>3.96</b>  | 580             | 5.5                                   | 1222                      | 164                         |
| <b>4.71</b>  | 580             | 4.46                                  | 1847                      | 248                         |
| <b>6.47</b>  | 580             | 2.97                                  | 2733                      | 367                         |
| <b>9.67</b>  | 580             | 1.6                                   | 4815                      | 647                         |

## 2. Training performance of the DCNN

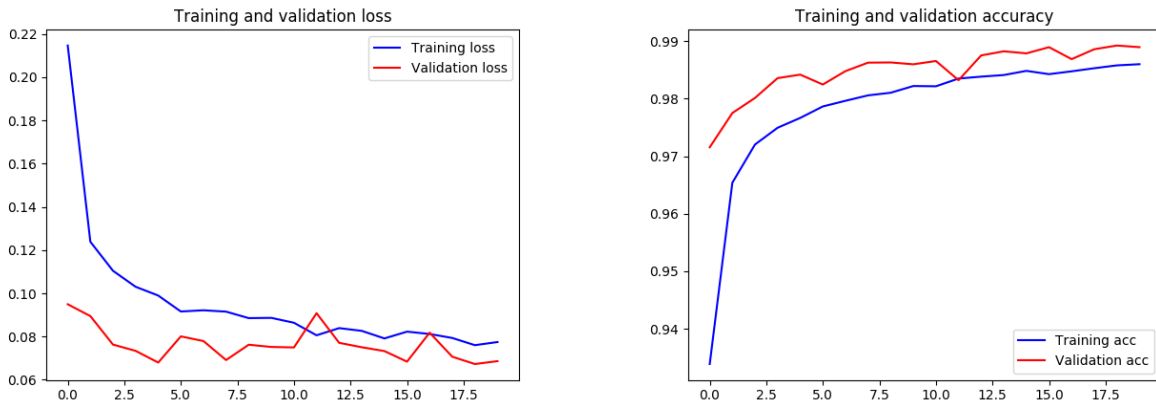

Table 2 gives a more detailed overview about the validation accuracy for each single species.

Table 4 Validation accuracy for each Species

| Species                   | Validation images | Validation accuracy |
|---------------------------|-------------------|---------------------|
| <b>Cyclamen</b>           | 2000              | 99.7                |
| <b>Rumex</b>              | 2000              | 98.65               |
| <b>Alnus</b>              | 2000              | 97.5                |
| <b>Fraxinus excelsior</b> | 2000              | 99.1                |
| <b>Carpinus betulus</b>   | 2000              | 99.1                |
| <b>Corylus</b>            | 2000              | 98                  |
| <b>Rosa corymbifera</b>   | 2000              | 99.4                |
| <b>Sambucus</b>           | 2000              | 98.1                |
| <b>Populous</b>           | 2000              | 98.7                |
| <b>Molinia</b>            | 2000              | 98.25               |
| <b>Ambrosia</b>           | 2000              | 99.85               |
| <b>Fagus sylvatica</b>    | 815               | 99.75               |
| <b>Scripus sylvaticus</b> | 1492              | 99.53               |
| <b>Helianthus annuus</b>  | 1546              | 100                 |
| <b>Ulmus</b>              | 2000              | 98.75               |

## 3. Pollen population analysis

To outline the impact of the foreign species to the classification results we compared the population analysis shown in the manuscript (b) with a population only containing the 15 trained pollen species (a) Automated classification was run applying a  $P_{\text{thresh}} = 0.735$ . The population results for sample A (a) show a high conformity between all three methods. Due to the reliable classification accuracy of the DCNN network (98.90%) a similar pollen distribution between 2D and mIFC classification was expected.

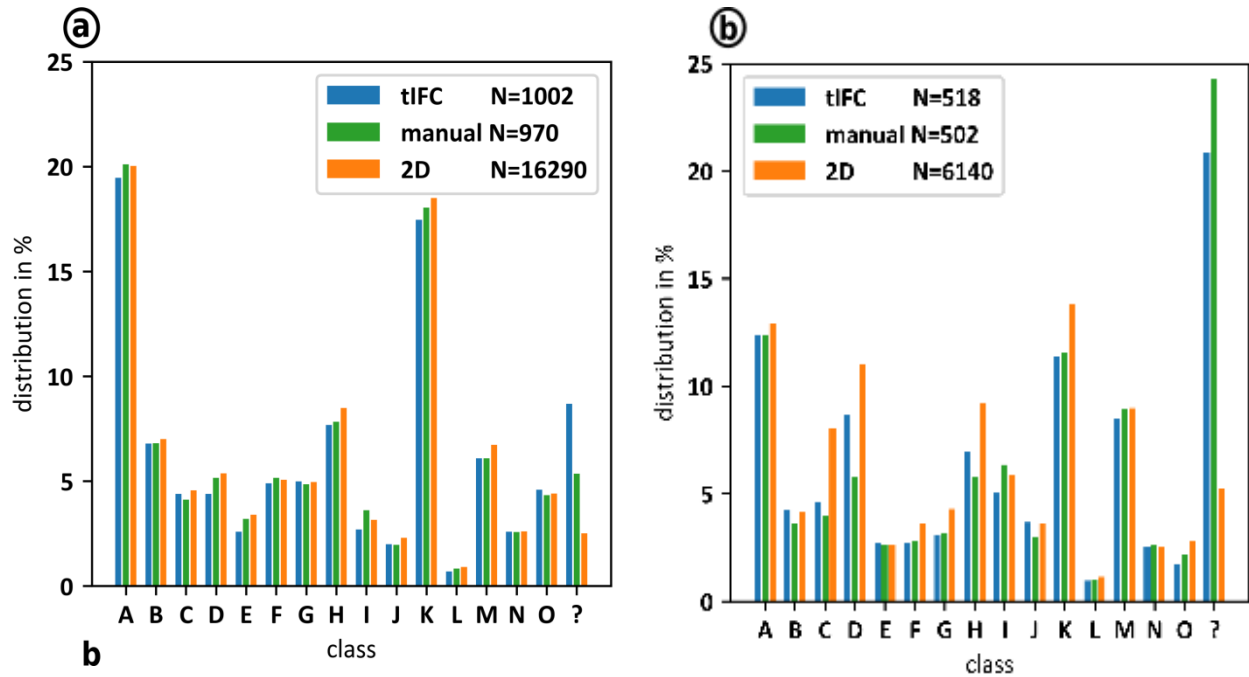

Pollen population analysis: Comparison of the pollen distribution for 2D-, mIFC- and manual classification. (a) Population analysis results for a sample containing 15 different pollen species with low foreign particle concentration. (b) Population analysis results for a sample containing 15 different pollen species with high foreign particle concentration. The numbers in the inset of the diagrams denote number of analyzed cells/images per method.

#### 4 Calculation of the angular velocity of red blood cells (RBC's)

Assumption:

- The absorbance of the bright field illumination changes with the orientation of the major and minor axis of the RBC'S
- Highest absorbance when light passes through major axis

Exception:

- No significant intensity changes when the RBC only rotates around its minor axis

Procedure:

1. Plot of the normalized Gray Value Intensity at 25 percentile (blue) and Gaussian fit (red) for each image of the tilt series.

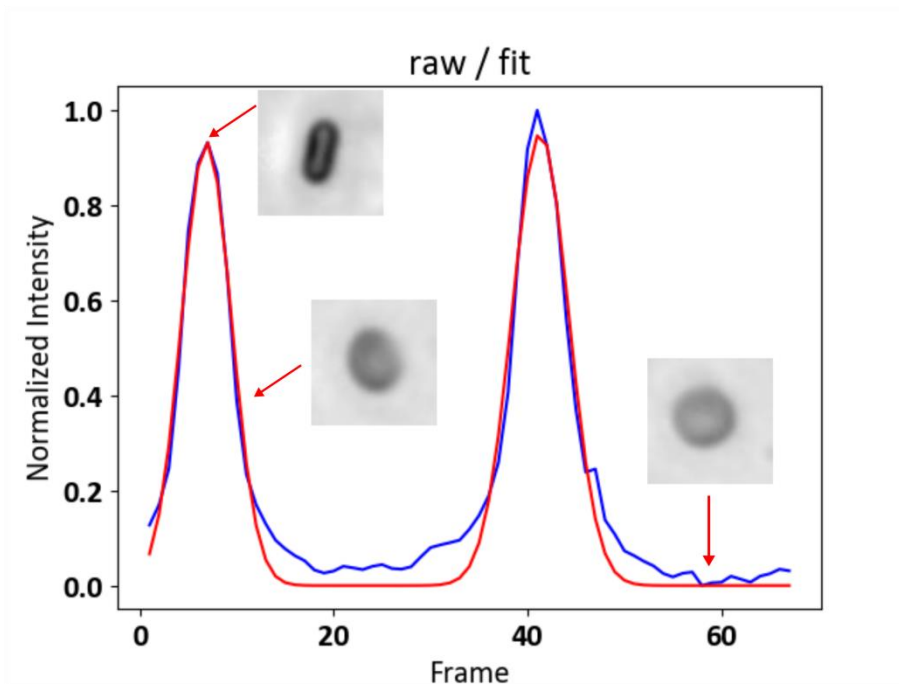

2. Normalization between 0 and 90 where the maximum intensity corresponds to 90 degree and the minimum intensity to 0 degree.

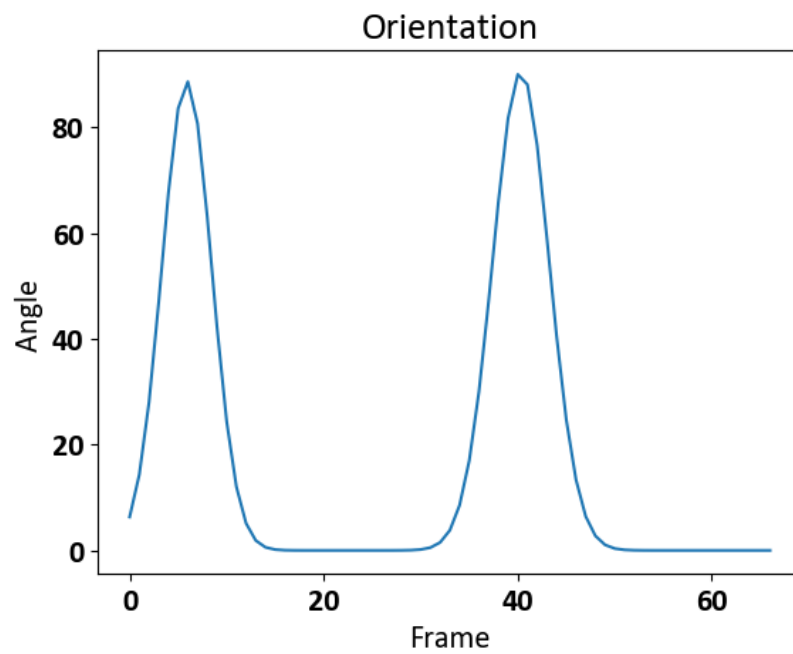

3. Angular change between neighboring frames

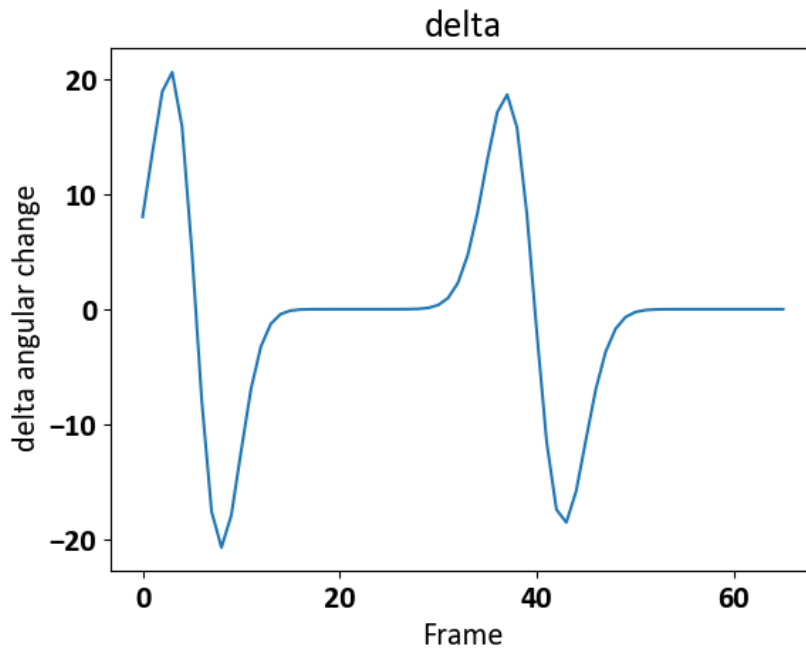

4. summation of the absolute value of delta angle

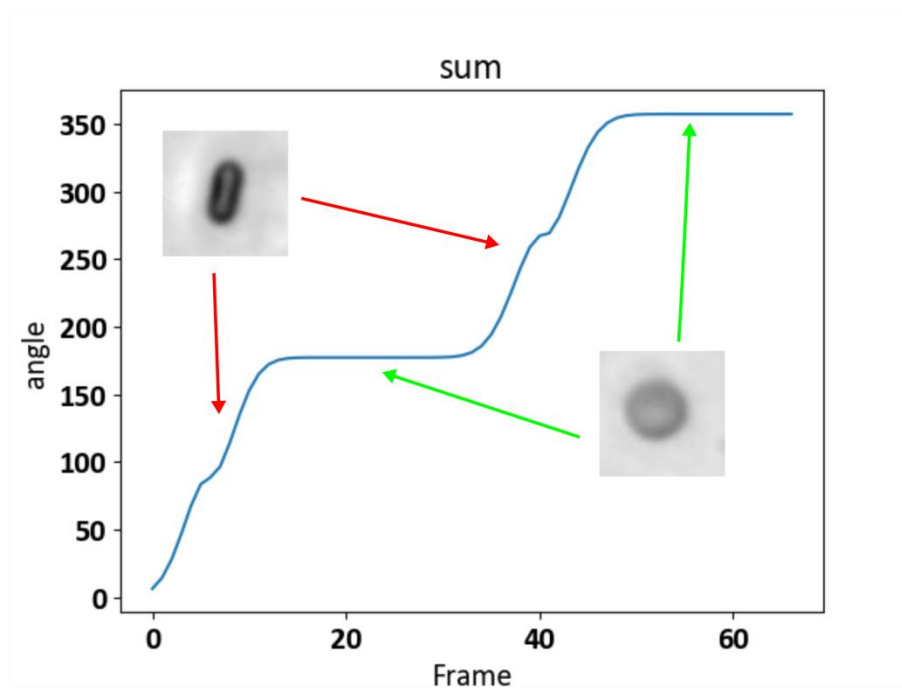

The plot outlines the flipping effect where we have two plateau area (green) without angular rotation and two areas with a step angular velocity (red) covering a 360° rotation. The summit angular shift between neighboring frames is saved in csv file and can be directly imported to tomviz.
