# Supplementary material for: 3-Step flow focusing enables multidirectional imaging of bioparticles for imaging flow cytometry
Source: Royal Society of Chemistry journal article supplement (doi:10.1039/d0lc00244e), 2020-01-01
Supplement: d0lc00244e2.pdf [file d0lc00244e2.pdf]

#### **Video\_1\_mIFC\_chip\_devised\_and\_functional\_units**

The video shows all functional units of the chip processing pollen grains.

#### **Video\_2\_sunflower\_preview**

Multidirectional imaging of a sunflower pollen. (left: raw data; right: series of cropped images) .

#### **Video\_3\_rotation\_modes**

Example data of the 3 rotation modes observed. A) Flipping; B) Tumbling; C) Around unique axis

#### **Video\_4\_pollen\_mix\_classification\_preview**

mIFC of a mixed population of 15 pollen species listed in Fig.6.

On the left you can see the full-frame images, the results of the object recognition as well as tracking ID and result of the classification. On the right you can see the cropped mIFC series for each detected pollen grain.

#### **Video\_5\_Hazel\_preview**

3d reconstruction result of a mIFC tilt series of a Hazel pollen.

#### **Video\_6\_wbc\_preview**

3d reconstruction of a white blood cell based on bright field images of the WBC and fluorescence images of the stained nuclei.
